# Supplementary material
Source: Springer Nature journal article supplement (https://www.springermedizin.de/resource/supplementary/12936_2011_1972_MOESM1_ESM.pdf/9542148)
Supplement: MOESM1 [file 9542148]

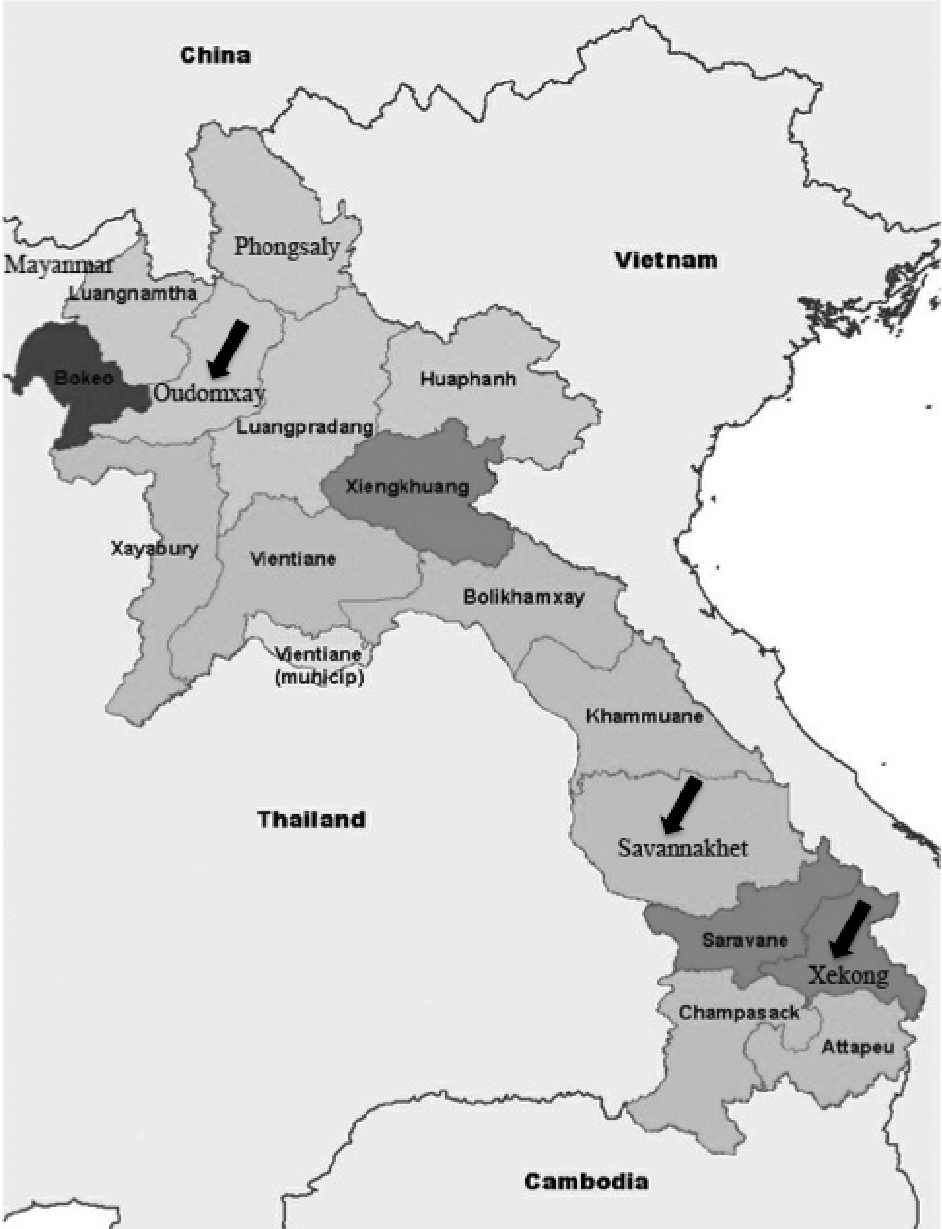

**China**

**Myanmar**

**Vietnam**

Phongsaly

Luangnamtha

Huaphanh

Bokeo

Oudomxay

Luangpradang

Xiengkhuang

Xayabury

Vientiane

Bolikhamxay

Vientiane  
(municipality)

Khammuane

**Thailand**

Savannakhet

Saravane

Xekong

Champasack

Attapeu

**Cambodia**
